# Supplementary material
Source: HighWire-hosted journal article supplement (https://hw-f5-jim.highwire.org/content/65/5/912)
Supplement: inline-supplementary-material-1 [file inline-supplementary-material-1.pdf]

Appendix. Tabulation of all noncardiac procedures and complications grouped by patient

| Date of LVAD | Procedure                                      | Date of NCS | INR | PTT  | Admission  | Complication                 | Status   |
|--------------|------------------------------------------------|-------------|-----|------|------------|------------------------------|----------|
| 10/01/07     | PEG tube placement                             | 10/15/07    | 1.2 | 35.8 | Same       |                              |          |
|              | Tracheostomy                                   | 10/15/07    | 1.2 | 35.8 | Same       |                              |          |
|              | Vocal cordotomy                                | 8/23/11     | 1.2 | 37.2 | Subsequent |                              |          |
| 7/30/08      | Tracheostomy                                   | 8/7/08      | 1.1 | 49.4 | Same       |                              |          |
| 8/15/08      | Aortoiliac angiogram                           | 3/16/09     | 1.9 | 29.1 | Subsequent | Wound dehiscence<br>Bleeding | Deceased |
|              | Superficial femoral artery and popliteal stent | 4/13/09     | 1.6 | 32.9 | Subsequent |                              |          |
|              | Heel ulcer debridement                         | 4/19/09     | 2.2 | 31.8 | Subsequent |                              |          |
|              | Heel ulcer debridement                         | 12/03/09    | 3.1 | 36.0 | Subsequent |                              |          |
|              | Below knee amputation                          | 12/29/09    | 1.8 | 31.1 | Subsequent |                              |          |
|              | Amputation wound debridement                   | 2/10/10     | 1.6 | 26.2 | Subsequent |                              |          |
|              | Amputation revision                            | 3/04/10     | 2.1 | 27.4 | Subsequent |                              |          |
|              | Distal femur ORIF                              | 12/01/10    | 1.3 | 27.6 | Subsequent |                              |          |
|              | Simple mastectomy                              | 12/10/10    | 1.2 | 54.3 | Subsequent |                              |          |
| 1/16/09      | Cataract removal                               | 8/17/09     | 2.7 | 35.7 | Subsequent |                              |          |
| 1/28/09      | Wound washout                                  | 2/16/09     | 3.4 | 39.1 | Same       |                              | Deceased |
| 2/18/09      | Diverting loop ileostomy                       | 9/23/10     | 1.1 | 30.7 | Subsequent | Wound infection              | Deceased |
|              | Retrocatheter placement                        | 9/28/11     | 2.3 | 150  | Subsequent |                              |          |
|              | Double J stent placement                       | 9/30/11     | 1.5 | 32.3 | Subsequent |                              |          |
|              | Open ureterolithotomy and cystolithotomy       | 10/07/11    | 1.1 | 29.6 | Subsequent | Wound infection              |          |

|         |                                               |          |     |      |            |                          |          |
|---------|-----------------------------------------------|----------|-----|------|------------|--------------------------|----------|
| 3/16/09 | Parasternal collection drainage               | 5/12/09  | 2.5 | 29.5 | Same       |                          |          |
|         | Right forearm arteriovenous graft             | 7/21/09  | 1.2 | 26.3 | Subsequent |                          |          |
| 3/20/09 | PEG tube placement                            | 4/06/09  | 1.6 | 29.1 | Same       |                          |          |
|         | Tracheostomy                                  | 4/06/09  | 1.6 | 29.1 | Same       |                          |          |
|         | Pectoralis flap                               | 4/08/09  | 1.5 | 27.2 | Same       |                          |          |
| 3/23/09 | Muscle biopsy                                 | 3/15/10  | --  | --   | Subsequent |                          |          |
|         | Tracheostomy                                  | 8/13/10  | 1.3 | 24.3 | Subsequent | Accidental decannulation |          |
| 4/13/09 | Exploratory laparotomy and lysis of adhesions | 9/09/09  | 1.1 | 29.5 | Subsequent |                          |          |
| 4/15/09 | Pedicled flap                                 | 9/28/11  | 1.5 | 31.6 | Subsequent | Nonviable flap           |          |
|         | Rectus flap                                   | 10/02/11 | 1.4 | 27.1 | Subsequent |                          |          |
| 4/19/09 | PEG tube placement                            | 9/24/09  | 1.4 | 34.9 | Subsequent |                          | Deceased |
|         | Tracheostomy                                  | 9/24/09  | 1.4 | 34.9 | Subsequent |                          |          |
| 5/06/09 | Rectus flap                                   | 6/09/09  | 1.5 | 44.0 | Same       | Acute kidney injury      | Deceased |
|         | Jejunostomy tube placement                    | 7/02/09  | 2.2 | 82.0 | Same       |                          |          |
| 5/12/09 | Lobectomy                                     | 7/23/09  | 1.2 | 26.6 | Subsequent | Persistent air leak      | Deceased |
| 7/31/09 | Jejunostomy tube placement                    | 8/28/09  | 1.3 | 33.7 | Same       |                          | Deceased |
|         | Myocutaneous flap                             | 9/15/09  | 1.8 | 35.8 | Same       |                          |          |
| 8/13/09 | Bladder biopsy                                | 6/20/13  | 1.3 | 33.6 | Subsequent | Hematuria                |          |
| 9/09/09 | Carpal tunnel release                         | 3/28/11  | 1.2 | 30.2 | Subsequent |                          | Deceased |
|         | Arteriovenous graft                           | 6/07/13  | 1.2 | 32.5 | Subsequent | Wound infection          |          |
|         | Balloon angioplasty of arteriovenous graft    | 2/12/14  | 1.2 | 35.6 | Subsequent |                          |          |

|          |                                                        |          |     |      |            |                                  |          |
|----------|--------------------------------------------------------|----------|-----|------|------------|----------------------------------|----------|
| 10/21/09 | Subtotal colectomy                                     | 11/26/09 | 1.3 | 55.2 | Same       |                                  | Deceased |
| 1/24/10  | Tracheostomy                                           | 2/04/10  | 1.4 | 28.9 | Same       |                                  | Deceased |
| 1/27/10  | Rectus muscle flap of infected driveline wound         | 7/28/14  | 2.0 | 31.7 | Subsequent |                                  | Deceased |
| 2/09/10  | Open inguinal hernia repair                            | 9/21/12  | 1.1 | 33.6 | Subsequent |                                  |          |
|          | Open inguinal hernia repair                            | 4/05/13  | 1.1 | 41.2 | Subsequent | Cellulitis                       |          |
| 5/26/10  | Femoral thromboembolectomy                             | 5/26/10  | 1.2 | 72.9 | Same       |                                  | Deceased |
|          | Hemicraniectomy                                        | 5/27/10  | 1.3 | 26.7 | Same       | Death                            |          |
|          | Testis biopsy                                          | 5/28/10  | 1.6 | 28.4 | Same       |                                  |          |
| 5/27/10  | Laparoscopic converted to open partial cholecystectomy | 4/18/12  | 1.7 | 54.2 | Subsequent | Intraabdominal abscess, bleeding |          |
| 6/14/10  | Cranial burr holes                                     | 11/20/10 | 1.3 | 37.3 | Subsequent |                                  |          |
|          | Craniotomy                                             | 11/24/10 | 1.3 | 39.9 | Subsequent |                                  |          |
| 6/21/10  | Rectus flap                                            | 1/31/11  | 2.0 | 35.0 | Subsequent | Bleeding                         | Deceased |
|          | Facial advancement flap                                | 7/28/11  | 1.2 | 38.3 | Subsequent |                                  |          |
|          | Nasal reconstruction                                   | 8/18/11  | 1.4 | 44.4 | Subsequent |                                  |          |
|          | Nasal reconstruction                                   | 9/13/11  | 2.6 | 57.6 | Subsequent |                                  |          |
|          | Olecranon bursa washout                                | 12/09/11 | 1.4 | 39.4 | Subsequent |                                  |          |
| 7/13/10  | Rectus flap for driveline infection                    | 8/27/10  | 1.3 | 26.8 | Same       | Abdominal hematoma               |          |
|          | Abdominal hematoma evacuation                          | 9/01/10  | 1.4 | 32.6 | Same       |                                  |          |
|          | Subcutaneous foreign body removal                      | 1/19/11  | 1.4 | 29.1 | Subsequent |                                  |          |
|          | Bilateral salpingo-oophorectomy                        | 6/24/11  | 1.3 | 51.2 | Subsequent | Bleeding                         |          |
| 12/02/10 | Tracheostomy                                           | 12/10/10 | 1.4 | 30.6 | Same       |                                  | Deceased |

|          |                                                 |          |     |      |            |                                      |          |
|----------|-------------------------------------------------|----------|-----|------|------------|--------------------------------------|----------|
|          | Omental flap                                    | 1/19/11  | 1.9 | 67.8 | Same       |                                      |          |
| 1/14/11  | Omental flap                                    | 2/28/11  | 1.5 | 28.8 | Same       |                                      | Deceased |
|          | Tracheostomy                                    | 3/08/11  | 1.4 | 30.2 | Same       |                                      |          |
| 2/19/11  | Tracheostomy                                    | 3/03/11  | 1.3 | 35.4 | Same       |                                      |          |
| 3/11/11  | Driveline site debridement                      | 7/02/12  | 2.1 | 59.0 | Subsequent |                                      |          |
| 4/19/11  | Sartorius flap recon                            | 5/03/11  | 1.2 | 26.1 | Same       |                                      | Deceased |
|          | Omental flap                                    | 5/10/11  | 1.2 | 30.4 | Same       |                                      |          |
|          | Tracheostomy                                    | 5/18/11  | 1.0 | 27.1 | Same       |                                      |          |
| 4/25/11  | Carotid artery stent                            | 2/24/12  | 1.2 | 34.3 | Subsequent | Hypotension,<br>transient<br>aphasia | Deceased |
|          | Carotid artery stent                            | 3/02/12  | 1.1 | 38.0 | Subsequent | Bleeding                             |          |
|          | Superficial femoral artery stent                | 5/09/14  | 1.3 | 52.4 | Subsequent |                                      |          |
| 4/26/11  | Tracheostomy                                    | 5/06/11  | 2.1 | 36.7 | Same       | Bleeding                             | Deceased |
|          | Open gastrostomy and jejunostomy tube placement | 6/16/11  | 1.2 | 29.0 | Same       |                                      |          |
| 6/08/11  | Needle prostate biopsy                          | 2/20/14  | 1.4 | 47.4 | Subsequent | Bacteremia,<br>Bleeding              |          |
| 9/21/11  | Pectoralis flap                                 | 11/04/11 | 1.2 | 32.0 | Same       | Hematoma                             | Deceased |
| 9/22/11  | Common femoral artery embolectomy               | 9/22/11  | 1.0 | 63.0 | Same       |                                      | Deceased |
| 11/10/11 | Tracheostomy                                    | 11/28/11 | 1.2 | 29.2 | Same       |                                      | Deceased |
| 12/08/11 | Lower extremity embolectomy                     | 2/06/12  | 2.0 | 39.0 | Subsequent |                                      | Deceased |
| 2/03/12  | EVAR                                            | 4/13/14  | 1.8 | 37.6 | Subsequent | Cardiac arrest                       | Deceased |
| 3/06/12  | Tracheostomy                                    | 4/03/12  | 1.1 | 37.9 | Same       |                                      | Deceased |
|          | PEG tube placement                              | 4/03/12  | 1.1 | 37.9 | Same       |                                      |          |

|          |                                                |          |     |      |            |          |          |
|----------|------------------------------------------------|----------|-----|------|------------|----------|----------|
|          | Hemicraniectomy                                | 5/12/12  | 1.3 | 32.2 | Same       |          |          |
|          | Hemicraniectomy                                | 5/12/12  | 1.3 | 32.2 | Same       | Death    |          |
| 4/26/12  | Subclavian port-a-cath removal                 | 5/03/12  | 1.9 | 42.2 | Same       |          |          |
|          | Breast implant removal                         | 2/4/13   | 1.3 | 85.6 | Subsequent |          |          |
| 5/31/12  | Cystoscopy                                     | 11/13/13 | 1.6 | 57.3 | Subsequent |          | Deceased |
| 6/22/12  | Rectus flap for driveline wound                | 9/29/14  | 1.5 | 39.0 | Subsequent | Bleeding |          |
| 8/03/12  | Transurethral bladder tumor excision           | 10/19/12 | 2.2 | 38.6 | Subsequent |          | Deceased |
|          | Bladder biopsy and fulguration                 | 4/12/13  | 1.4 | 64.6 | Subsequent |          |          |
| 9/14/12  | Subclavian port-a-cath removal                 | 9/29/12  | 1.0 | 44.8 | Same       | Bleeding |          |
|          | Video-assisted thorascopic decortication       | 11/2/12  | 2.3 | 32.9 | Subsequent |          |          |
|          | Tracheostomy                                   | 11/16/12 | 1.1 | 28.6 | Subsequent | Bleeding |          |
|          | Tracheostomy site exploration                  | 11/17/12 | 1.1 | 57.0 | Subsequent |          |          |
|          | Laparoscopic cholecystectomy                   | 3/27/13  | 1.1 | 28.5 | Subsequent |          |          |
| 11/07/12 | Tracheostomy                                   | 11/16/12 | 1.2 | 28.4 | Same       | Bleeding |          |
|          | Redo Tracheostomy                              | 11/17/12 | 1.0 | 28.5 | Same       |          |          |
|          | Redo Tracheostomy                              | 1/31/13  | 1.9 | --   | Subsequent |          |          |
| 11/08/12 | Sacral decubitus ulcer debridement             | 2/01/13  | 2.1 | 27.0 | Subsequent |          |          |
|          | Rectus flap                                    | 4/01/14  | 1.8 | 32.4 | Subsequent |          |          |
| 12/07/12 | Small bowel resection with primary anastomosis | 9/10/13  | 1.4 | 35.7 | Subsequent | Death    | Deceased |
| 12/13/12 | Tracheostomy                                   | 12/26/12 | 1.3 | 34.3 | Same       |          |          |
|          | PEG tube placement                             | 12/26/12 | 1.3 | 34.3 | Same       |          |          |

|          |                                                      |          |     |      |            |                                     |          |
|----------|------------------------------------------------------|----------|-----|------|------------|-------------------------------------|----------|
| 3/01/13  | Sartorius flap                                       | 3/15/13  | 1.2 | 66.8 | Same       | Fever                               |          |
|          | Laparoscopic appendectomy                            | 3/24/15  | 3.0 | 36.1 | Subsequent |                                     |          |
| 3/12/13  | Exploratory laparotomy                               | 3/27/13  | 1.8 | 64.5 | Same       |                                     | Deceased |
| 3/25/13  | Tracheostomy                                         | 4/04/13  | 1.3 | 28.6 | Same       | Bleeding                            | Deceased |
|          | Tracheostomy site exploration                        | 4/10/13  | 1.1 | 28.5 | Same       |                                     |          |
| 4/11/13  | Craniotomy                                           | 2/24/14  | 2.0 | 34.3 | Subsequent | Death                               | Deceased |
| 5/01/13  | Revision total hip arthroplasty                      | 3/26/14  | 1.0 | 30.- | Subsequent | Bleeding                            |          |
|          | Revision total hip arthroplasty                      | 9/19/14  | 1.2 | 32.5 | Subsequent |                                     |          |
| 5/23/13  | Hysterectomy, salpingo-oophorectomy                  | 9/5/13   | 1.8 | 28.1 | Subsequent | Bowel obstruction, wound dehiscence | Deceased |
| 5/30/13  | Retroperitoneal hematoma evacuation                  | 6/10/13  | 2.5 | 37.9 | Same       |                                     | Deceased |
|          | Hemicraniectomy                                      | 8/18/13  | 1.7 | 30.5 | Subsequent | Death                               |          |
| 7/06/13  | Tracheostomy                                         | 9/17/13  | 2.0 | 43.8 | Same       |                                     | Deceased |
| 7/25/13  | Exploratory laparotomy, ileocecectomy, end ileostomy | 9/30/13  | 3.6 | 56.3 | Subsequent |                                     | Deceased |
|          | Ileostomy reversal                                   | 12/09/13 | 1.5 | 33.0 | Subsequent |                                     |          |
| 8/12/13  | Hemorrhoidectomy                                     | 8/27/14  | 1.2 | --   | Subsequent | Bleeding                            |          |
|          | Rectal EUA with control of rectal bleeding           | 9/18/14  | 1.5 | 45.5 | Subsequent |                                     |          |
|          | Omental flap of VAD pocket                           | 1/13/15  | 1.3 | 30.6 | Subsequent |                                     |          |
| 8/20/13  | Total knee Replacement                               | 11/13/14 | 2.1 | 29.9 | Subsequent |                                     |          |
| 11/14/13 | Tracheostomy                                         | 12/05/13 | 1.4 | 51.0 | Same       |                                     |          |
|          | Jejunostomy tube placement                           | 1/09/14  | 1.9 | 36.0 | Subsequent |                                     |          |

|          |                                    |          |     |      |            |                     |          |
|----------|------------------------------------|----------|-----|------|------------|---------------------|----------|
| 12/18/13 | Knee arthrotomy                    | 1/02/14  | 1.5 | 31.6 | Same       |                     |          |
|          | Omental flap                       | 4/08/14  | 1.8 | 32.5 | Subsequent |                     |          |
| 3/26/14  | Tracheostomy                       | 4/22/14  | 1.2 | 52.8 | Same       |                     | Deceased |
| 6/04/14  | Laparoscopic cholecystectomy       | 7/22/14  | 1.9 | 34.5 | Subsequent |                     |          |
| 9/23/14  | Sartorius flap                     | 10/13/14 | 1.2 | 32.5 | Same       | Acute kidney injury |          |
|          | Cystoscopy, Exploratory laparotomy | 10/21/14 | 1.2 | 32.1 | Same       | Bladder perforation |          |
| 9/25/14  | Hemicraniectomy                    | 1/28/15  | 1.3 | 27.0 | Subsequent | Death               | Deceased |
| 10/07/14 | Pectoralis flap                    | 11/11/14 | 1.4 | 31.4 | Same       | Wound dehiscence    | Deceased |
|          | Arteriovenous graft                | 2/10/15  | 1.6 | 38.9 | Same       |                     |          |
| 10/16/14 | Tracheostomy                       | 10/23/14 | 1.4 | 42.5 | Same       |                     |          |
| 4/03/15  | Lower extremity thromboembolectomy | 4/03/15  | 1.4 | 32.7 | Same       | Groin abscess       |          |
|          | Sartorius flap                     | 4/16/15  | 1.4 | 30.1 | Same       |                     |          |
|          | Groin incision and drainage        | 5/15/15  | 2.4 | 34.0 | Subsequent |                     |          |
